# Supplementary material for: The snoRNA target of t(4;14) in multiple myeloma regulates ribosome biogenesis
Source: PubMed Central journal article supplement (PMC6996358; doi:10.1096/fba.2018-00075), 2019-05-22

# MM1.S

**A**

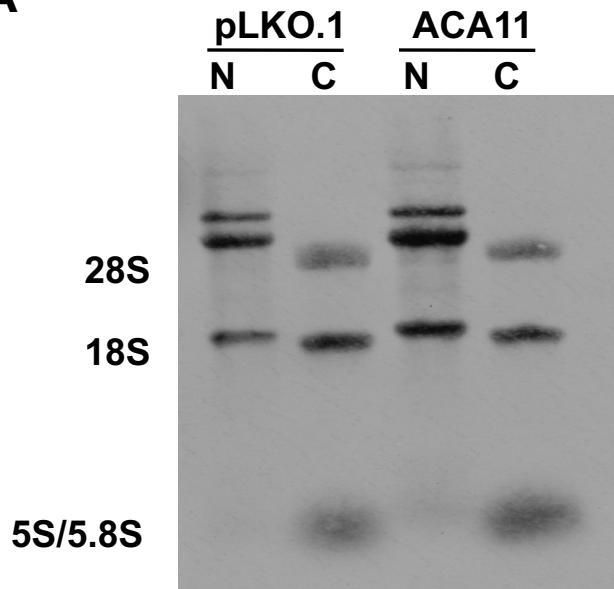

|         | pLKO.1 N | pLKO.1 C | ACA11 N | ACA11 C |
|---------|----------|----------|---------|---------|
| 28S     | 58       | 42       | 59      | 41      |
| 18S     | 55       | 45       | 52      | 48      |
| 5S/5.8S | 5        | 95       | 8       | 92      |

% Localization

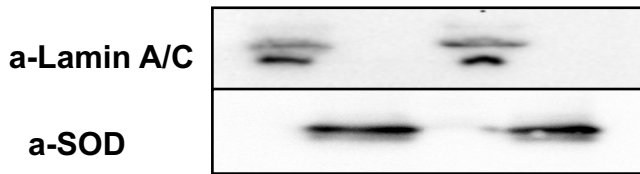

# H929

**B**

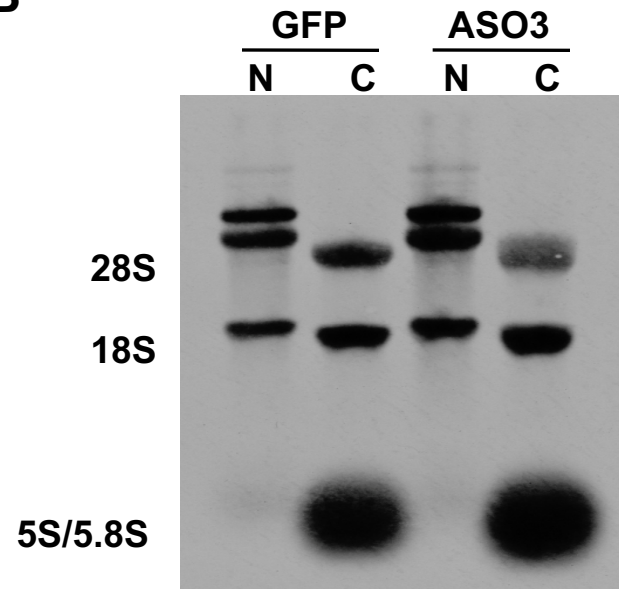

|         | GFP N | GFP C | ASO3 N | ASO3 C |
|---------|-------|-------|--------|--------|
| 28S     | 42    | 58    | 40     | 60     |
| 18S     | 38    | 62    | 41     | 59     |
| 5S/5.8S | 6     | 94    | 6      | 94     |

% Localization

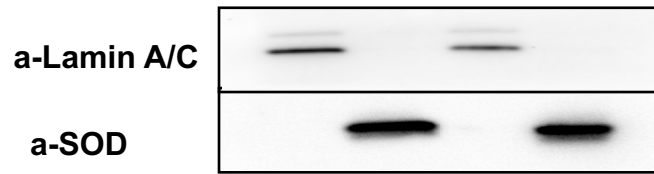

Supplement: FBA2-1-404-s001.pdf [file FBA2-1-404-s001.pdf]
