# Supplementary material for: The snoRNA target of t(4;14) in multiple myeloma regulates ribosome biogenesis
Source: PubMed Central journal article supplement (PMC6996358; doi:10.1096/fba.2018-00075), 2019-05-22

# MM1.S cells

pLKO.1

ACA11

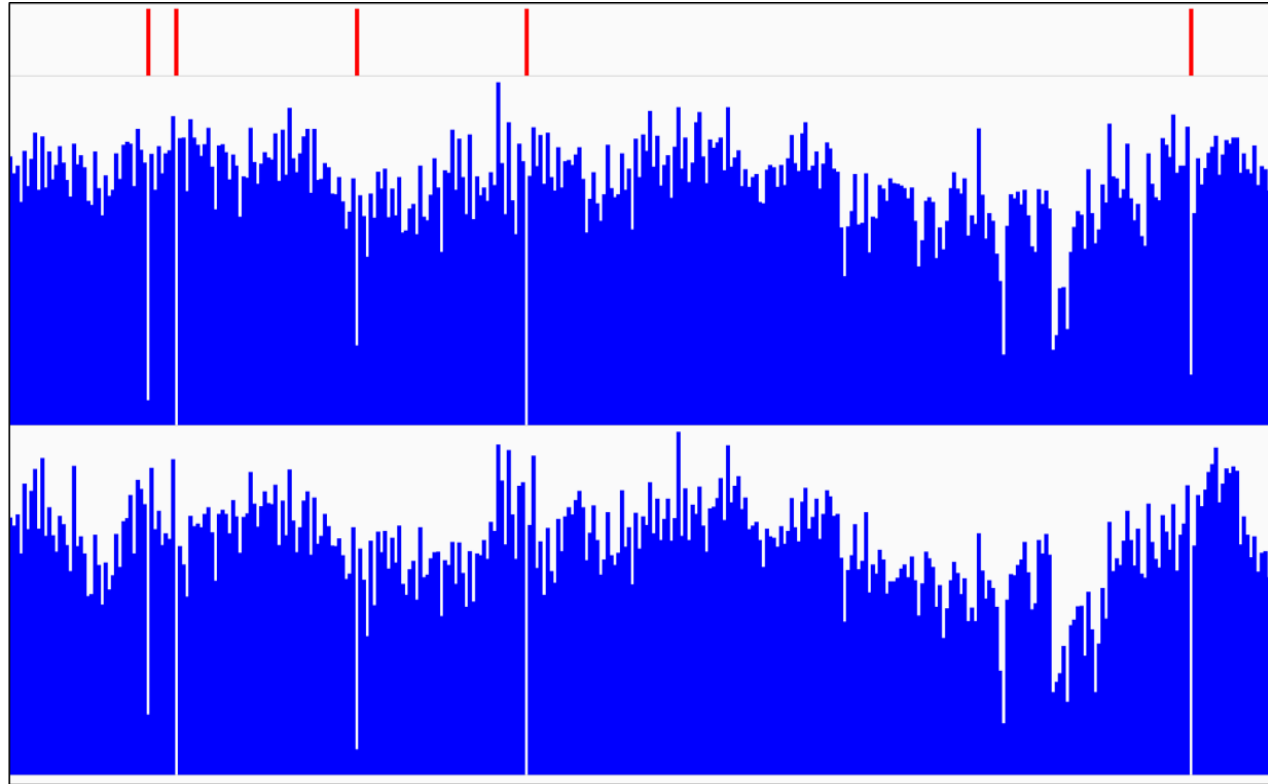

Supplement: FBA2-1-404-s002.pdf [file FBA2-1-404-s002.pdf]
