# Supplementary material for: The snoRNA target of t(4;14) in multiple myeloma regulates ribosome biogenesis
Source: PubMed Central journal article supplement (PMC6996358; doi:10.1096/fba.2018-00075), 2019-05-22
Supplement: FBA2-1-404-s003.pdf [file FBA2-1-404-s003.pdf]

---

|                         | <b>5'rAppCTGTAGGCACCATCAAT/3ddC/ 3'</b>                                                                                       |
|-------------------------|-------------------------------------------------------------------------------------------------------------------------------|
| <b>RS-1 (RT Primer)</b> | <i>/5Phos/AGATCGGAAGAGCGTCGTGTAGGGAAAGAGTGTAGATCTCGGTGGTCGC/iSp18/CACTCA /iSp18/TTCAGACGTGTGCTCTTCCGATCTATTGATGGTGCCTACAG</i> |
| <b>RS-F (FW primer)</b> | <i>AATGATACGGCGACCACCGAGATCTACAC</i>                                                                                          |
| <b>RS-R-1</b>           | <i>CAAGCAGAAGACGGCATAACGAGAT<u>AGTCGT</u>GTGACTGGAGTTCAGACGTGTGCTCTTCCG</i>                                                   |
| <b>RS-R-2</b>           | <i>CAAGCAGAAGACGGCATAACGAGAT<u>ACTGAT</u>GTGACTGGAGTTCAGACGTGTGCTCTTCCG</i>                                                   |
| <b>RS-R-3</b>           | <i>CAAGCAGAAGACGGCATAACGAGAT<u>ATGCTG</u>GTGACTGGAGTTCAGACGTGTGCTCTTCCG</i>                                                   |
| <b>RS-R-4</b>           | <i>CAAGCAGAAGACGGCATAACGAGAT<u>ACGTCC</u>GTGACTGGAGTTCAGACGTGTGCTCTTCCG</i>                                                   |
| <b>RS-R-5</b>           | <i>CAAGCAGAAGACGGCATAACGAGAT<u>AGCTGC</u>GTGACTGGAGTTCAGACGTGTGCTCTTCCG</i>                                                   |
| <b>RS-R-6</b>           | <i>CAAGCAGAAGACGGCATAACGAGAT<u>ATCGTA</u>GTGACTGGAGTTCAGACGTGTGCTCTTCCG</i>                                                   |
| <b>RS-R-7</b>           | <i>CAAGCAGAAGACGGCATAACGAGAT<u>TGGTCA</u>GTGACTGGAGTTCAGACGTGTGCTCTTCCG</i>                                                   |
| <b>RS-R-8</b>           | <i>CAAGCAGAAGACGGCATAACGAGAT<u>CACTGT</u>GTGACTGGAGTTCAGACGTGTGCTCTTCCG</i>                                                   |
| <b>RS-R-9</b>           | <i>CAAGCAGAAGACGGCATAACGAGAT<u>ATTGGC</u>GTGACTGGAGTTCAGACGTGTGCTCTTCCG</i>                                                   |
| <b>RS-R-10</b>          | <i>CAAGCAGAAGACGGCATAACGAGAT<u>GATCTG</u>GTGACTGGAGTTCAGACGTGTGCTCTTCCG</i>                                                   |
| <b>RS-R-11</b>          | <i>CAAGCAGAAGACGGCATAACGAGAT<u>TCAAGT</u>GTGACTGGAGTTCAGACGTGTGCTCTTCCG</i>                                                   |
| <b>RS-R-12</b>          | <i>CAAGCAGAAGACGGCATAACGAGAT<u>CTGATC</u>GTGACTGGAGTTCAGACGTGTGCTCTTCCG</i>                                                   |

---

**Supplemental table 1.** Linker and Primers used for 2'-O-Methylation-seq library preparation
