# Supplementary material for: The snoRNA target of t(4;14) in multiple myeloma regulates ribosome biogenesis
Source: PubMed Central journal article supplement (PMC6996358; doi:10.1096/fba.2018-00075), 2019-05-22
Supplement: FBA2-1-404-s004.pdf [file FBA2-1-404-s004.pdf]

| rRNA        | Control |       | ACA11 overexpressing |       |
|-------------|---------|-------|----------------------|-------|
| <i>5.8S</i> |         |       |                      |       |
| 14          | 0.340   | 0.069 | 0.168                | 0.290 |
| 157         | 0.996   | 0.004 | 0.999                | 0.001 |
| <i>18S</i>  |         |       |                      |       |
| 27          | 1.000   | 0.000 | 1.000                | 0.000 |
| 99          | 0.983   | 0.003 | 0.983                | 0.002 |
| 116         | 0.977   | 0.007 | 0.970                | 0.019 |
| 121         | 0.965   | 0.021 | 0.959                | 0.027 |
| 159         | 0.995   | 0.001 | 0.994                | 0.006 |
| 166         | 0.999   | 0.000 | 0.995                | 0.009 |
| 172         | 0.995   | 0.002 | 0.989                | 0.007 |
| 174         | 0.893   | 0.029 | 0.916                | 0.053 |
| 428         | 0.794   | 0.037 | 0.727                | 0.111 |
| 436         | 0.826   | 0.048 | 0.755                | 0.127 |
| 462         | 0.995   | 0.003 | 0.998                | 0.003 |
| 468         | 0.983   | 0.003 | 0.985                | 0.004 |
| 484         | 0.997   | 0.004 | 0.996                | 0.007 |
| 509         | 1.000   | 0.001 | 1.000                | 0.000 |
| 512         | 0.998   | 0.001 | 1.000                | 0.000 |
| 517         | 0.998   | 0.002 | 0.998                | 0.002 |
| 576         | 0.984   | 0.006 | 0.962                | 0.038 |
| 590         | 0.993   | 0.003 | 0.995                | 0.004 |
| 601         | 1.000   | 0.000 | 0.996                | 0.004 |
| 627         | 0.999   | 0.000 | 0.998                | 0.000 |
| 644         | 0.997   | 0.002 | 0.997                | 0.002 |
| 668         | 0.993   | 0.005 | 0.996                | 0.001 |
| 683         | 0.999   | 0.001 | 0.999                | 0.001 |
| 797         | 0.985   | 0.002 | 0.992                | 0.003 |
| 799         | 1.000   | 0.000 | 1.000                | 0.000 |
| 867         | 0.612   | 0.083 | 0.630                | 0.099 |
| 1031        | 1.000   | 0.000 | 1.000                | 0.000 |
| 1272        | 0.861   | 0.055 | 0.877                | 0.040 |
| 1288        | 0.998   | 0.000 | 0.998                | 0.001 |
| 1328        | 1.000   | 0.000 | 1.000                | 0.000 |
| 1383        | 0.998   | 0.001 | 0.998                | 0.002 |
| 1391        | 0.999   | 0.000 | 0.999                | 0.001 |
| 1442        | 0.991   | 0.008 | 0.994                | 0.004 |
| 1490        | 1.000   | 0.000 | 1.000                | 0.000 |
| 1678        | 0.998   | 0.001 | 0.999                | 0.001 |
| 1703        | 0.994   | 0.002 | 0.991                | 0.008 |
| 1804        | 0.968   | 0.008 | 0.963                | 0.024 |
| <i>28S</i>  |         |       |                      |       |
| 1340        | 0.910   | 0.022 | 0.923                | 0.015 |
| 1522        | 1.000   | 0.000 | 1.000                | 0.000 |
| 1524        | 1.000   | 0.000 | 1.000                | 0.000 |

|      |       |       |       |       |
|------|-------|-------|-------|-------|
| 1534 | 1.000 | 0.000 | 0.997 | 0.002 |
| 1625 | 0.999 | 0.001 | 0.998 | 0.001 |
| 1871 | 0.992 | 0.007 | 0.996 | 0.006 |
| 2351 | 0.974 | 0.027 | 0.997 | 0.002 |
| 2363 | 1.000 | 0.000 | 1.000 | 0.000 |
| 2364 | 1.000 | 0.000 | 0.997 | 0.006 |
| 2365 | 0.794 | 0.129 | 0.922 | 0.027 |
| 2415 | 0.933 | 0.023 | 0.944 | 0.009 |
| 2422 | 0.991 | 0.003 | 0.988 | 0.009 |
| 2424 | 0.998 | 0.002 | 1.000 | 0.000 |
| 2787 | 0.981 | 0.006 | 0.983 | 0.003 |
| 2804 | 0.986 | 0.005 | 0.986 | 0.010 |
| 2815 | 0.991 | 0.003 | 0.995 | 0.004 |
| 2824 | 0.988 | 0.004 | 0.991 | 0.006 |
| 2837 | 1.000 | 0.000 | 1.000 | 0.000 |
| 2861 | 0.901 | 0.031 | 0.879 | 0.088 |
| 3701 | 0.999 | 0.001 | 1.000 | 0.000 |
| 3718 | 0.998 | 0.001 | 1.000 | 0.001 |
| 3724 | 0.981 | 0.024 | 0.996 | 0.001 |
| 3744 | 0.975 | 0.007 | 0.990 | 0.005 |
| 3760 | 1.000 | 0.001 | 1.000 | 0.000 |
| 3785 | 1.000 | 0.000 | 1.000 | 0.000 |
| 3808 | 0.979 | 0.004 | 0.993 | 0.008 |
| 3818 | 1.000 | 0.000 | 0.999 | 0.001 |
| 3825 | 0.999 | 0.000 | 0.998 | 0.002 |
| 3830 | 0.997 | 0.002 | 0.993 | 0.003 |
| 3841 | 0.992 | 0.002 | 0.993 | 0.003 |
| 3869 | 0.969 | 0.007 | 0.972 | 0.005 |
| 3887 | 0.987 | 0.018 | 0.996 | 0.003 |
| 3925 | 0.983 | 0.004 | 0.976 | 0.028 |
| 3944 | 0.991 | 0.005 | 0.996 | 0.004 |
| 4042 | 0.416 | 0.123 | 0.726 | 0.118 |
| 4054 | 0.995 | 0.004 | 1.000 | 0.000 |
| 4196 | 1.000 | 0.001 | 1.000 | 0.000 |
| 4227 | 0.996 | 0.001 | 1.000 | 0.000 |
| 4228 | 1.000 | 0.000 | 1.000 | 0.000 |
| 4306 | 0.997 | 0.006 | 1.000 | 0.000 |
| 4370 | 0.999 | 0.001 | 0.999 | 0.001 |
| 4392 | 0.999 | 0.000 | 0.999 | 0.001 |
| 4456 | 0.990 | 0.005 | 0.978 | 0.015 |
| 4494 | 0.999 | 0.001 | 1.000 | 0.001 |
| 4498 | 0.867 | 0.010 | 0.904 | 0.057 |
| 4499 | 0.978 | 0.002 | 0.988 | 0.003 |
| 4523 | 0.999 | 0.000 | 0.999 | 0.001 |
| 4536 | 0.995 | 0.005 | 0.997 | 0.004 |
| 4571 | 0.986 | 0.002 | 0.979 | 0.007 |

|             |       |       |       |       |
|-------------|-------|-------|-------|-------|
| <b>4590</b> | 0.851 | 0.022 | 0.832 | 0.095 |
| <b>4618</b> | 0.940 | 0.005 | 0.939 | 0.034 |
| <b>4620</b> | 0.934 | 0.018 | 0.915 | 0.028 |
| <b>4623</b> | 0.998 | 0.001 | 0.994 | 0.006 |
| <b>4637</b> | 0.946 | 0.006 | 0.940 | 0.019 |

**Supplemental table 2.** Meth-Scores for annotated 2'-O-Me sites in 5.8, 18, and 28S rRNA from control and ACA11 overexpressing MM.1S cells. Scores are shown as the mean score|standard deviation.
